# Supplementary material
Source: ML conference proceedings conference paper supplement (https://openaccess.thecvf.com/content/ICCV2023/html/Chen_Exploring_Open-Vocabulary_Semantic_ICCV_2023_paper.html)
Supplement: Supplementary file 1 [file Chen_Exploring_Open-Vocabulary_Semantic_ICCV_2023_supplemental.pdf]

# Supplementary: Exploring Open-Vocabulary Semantic Segmentation from CLIP Vision Encoder Distillation Only

This Supplemental Material contains the following contents:

## Contents

|                                                |   |
|------------------------------------------------|---|
| <a href="#">1. Hyperparameters</a>             | 1 |
| <a href="#">2. More visualization examples</a> | 1 |

### 1. Hyperparameters

The training hyperparameters are displayed in Table 1.

| config                       | value                        |
|------------------------------|------------------------------|
| optimizer                    | AdamW                        |
| base learning rate           | 1e-4                         |
| weight decay                 | 0.05                         |
| optimizer momentum           | $\beta_1, \beta_2=0.9, 0.95$ |
| batch size                   | 4096                         |
| total epochs                 | 80                           |
| warmup epochs                | 20                           |
| masked decoder layer         | 8                            |
| first-stage grouping layer   | 2                            |
| second-stage grouping layers | 2                            |
| first-stage group tokens     | 32                           |
| second-stage group tokens    | 8                            |

Table 1. **Hyperparameter setting.**

### 2. More visualization examples

We sample more examples from ImageNet 1k [2] and Conceptual Caption [1] val dataset and demonstrate them in the Fig. 1 and Fig. 2

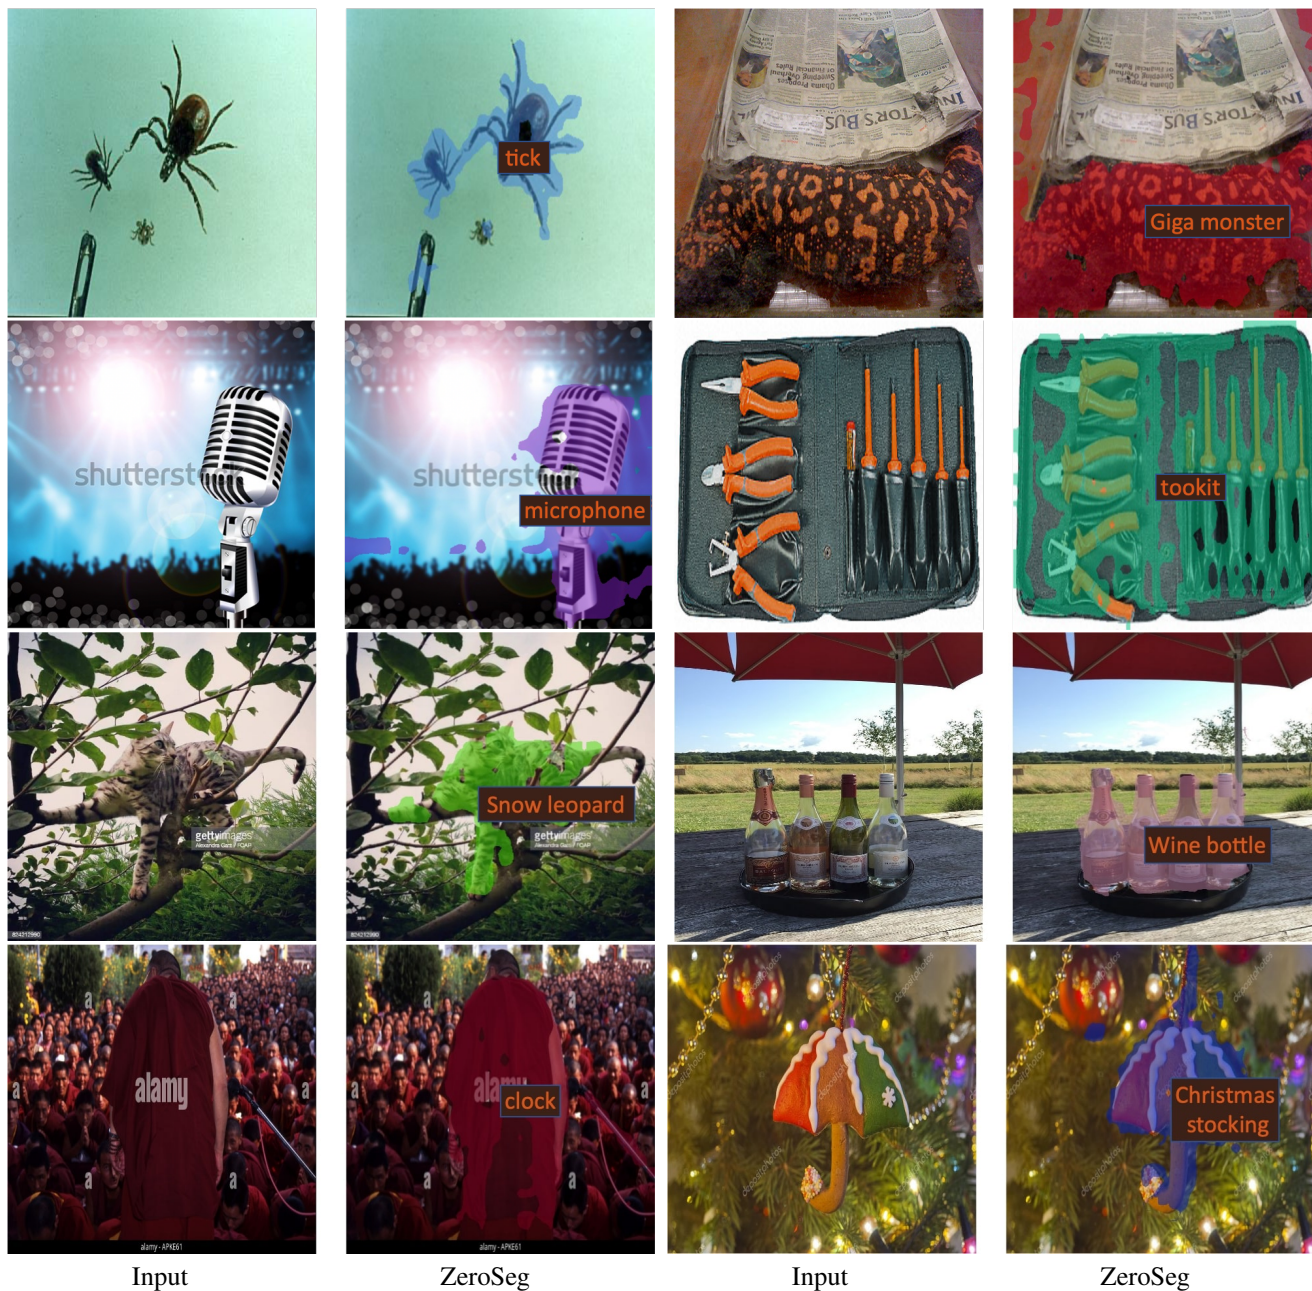

Figure 1. More sampled example from ImageNet and Conceptual Caption val set

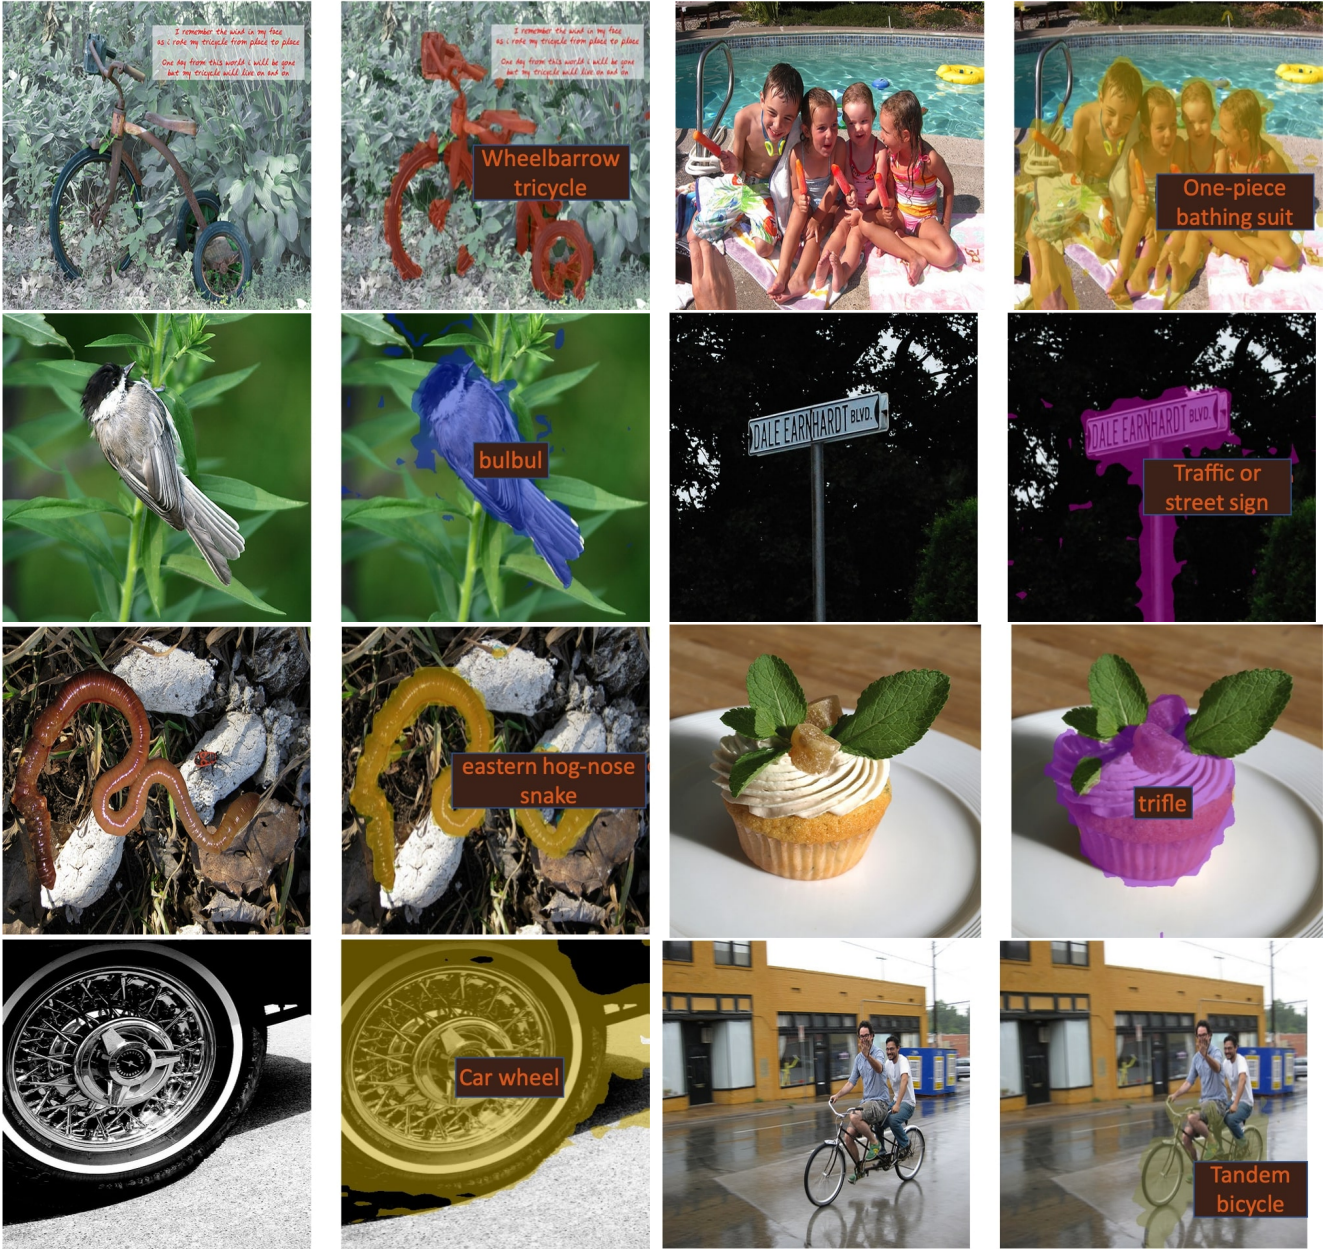

Input

ZeroSeg

Input

ZeroSeg

Figure 2. More sampled example from ImageNet and Conceptual Caption val set

## References

- [1] Soravit Changpinyo, Piyush Sharma, Nan Ding, and Radu Soricut. Conceptual 12m: Pushing web-scale image-text pre-training to recognize long-tail visual concepts. In *Proceedings of the IEEE/CVF Conference on Computer Vision and Pattern Recognition*, pages 3558–3568, 2021. 1
- [2] Jia Deng, Wei Dong, Richard Socher, Li-Jia Li, Kai Li, and Li Fei-Fei. Imagenet: A large-scale hierarchical image database. In *2009 IEEE conference on computer vision and pattern recognition*, pages 248–255. Ieee, 2009. 1
